# Supplementary material for: Worry is associated with robust reductions in heart rate variability: a transdiagnostic study of anxiety psychopathology
Source: PubMed Central journal article supplement (PMC4891851; doi:10.1186/s40359-016-0138-z), 2016-06-03
Supplement: 40359_2016_138_MOESM1_ESM.pdf [file 40359_2016_138_MOESM1_ESM.pdf]

## Guidelines for reporting articles on psychiatry and heart rate variability (GRAPH) checklist items

| Topic                                    | Item number | Checklist item                                                                                               | Reported on page number |
|------------------------------------------|-------------|--------------------------------------------------------------------------------------------------------------|-------------------------|
| <b>Selection of participants</b>         |             |                                                                                                              |                         |
| Clinical group recruitment and selection | 1a          | Psychiatric group recruitment details and illness assessment methods.                                        |                         |
| Control group recruitment and selection  | 1b          | Control group recruitment details and methods to rule out psychiatric illness.                               |                         |
| Inclusion criteria                       | 1c          | Description of inclusion criteria (e.g., absence of physical health conditions).                             |                         |
| Disease characteristics                  | 1d          | Description of disease duration, severity, psychiatric comorbidities, and medication status.                 |                         |
| Demographics                             | 1e          | Details on age, gender distribution, physical activity level, alcohol intake, and nicotine intake.           |                         |
| <b>IBI collection</b>                    |             |                                                                                                              |                         |
| Hardware / software details              | 2a          | Brand, electrode configuration (if applicable)                                                               |                         |
| IBI collection details                   | 2b          | Raw sampling rate, length of data collection, time of day, filtering, participant posture, and instructions. |                         |
| <b>IBI analysis and cleaning</b>         |             |                                                                                                              |                         |
| IBI calculation                          | 3a          | IBI calculation and resampling methods.                                                                      |                         |
| IBI artifact identification              | 3b          | IBI artifact identification method (e.g., algorithm, manual inspection).                                     |                         |
| IBI data loss                            | 3c          | Reasons for loss (e.g., persistent ectopy, equipment failure)                                                |                         |
| IBI cleaning                             | 3d          | Artifact cleaning methods and the percentage of beats were corrected.                                        |                         |
| <b>HRV calculation</b>                   |             |                                                                                                              |                         |
| Method of analysis used                  | 4a          | Metrics used and the software/script used for HRV calculation, log transformation (if applicable)            |                         |
| Frequency bands used                     | 4b          | Specification of bands and how they were interpreted.                                                        |                         |
